# Supplementary material for: Epstein-Barr virus lytic infection promotes activation of Toll-like receptor 8 innate immune response in systemic sclerosis monocytes
Source: PubMed Central journal article supplement (PMC5331713; doi:10.1186/s13075-017-1237-9), 2017-02-28

Figure S1

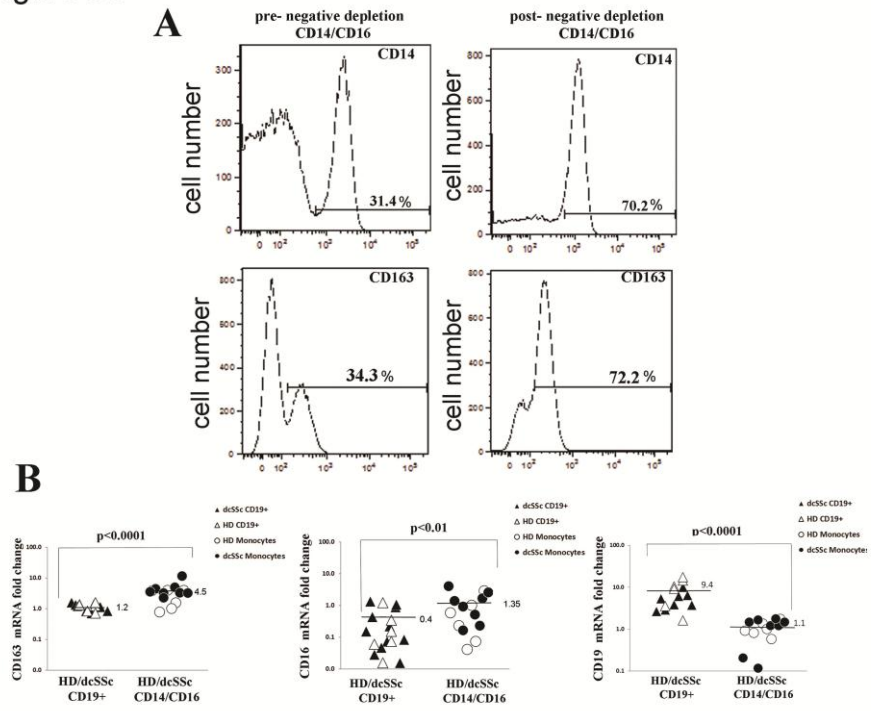

Figure S2

A

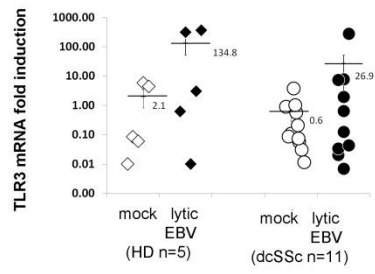

B

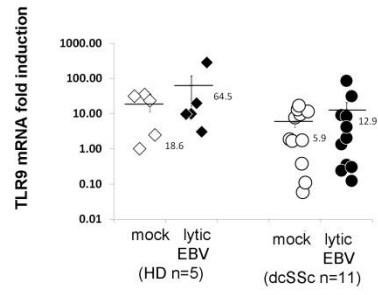

C

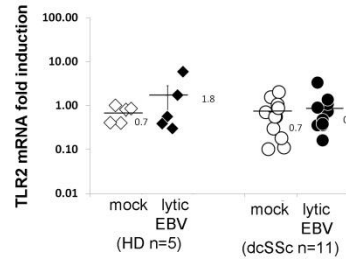

**Figure S3**

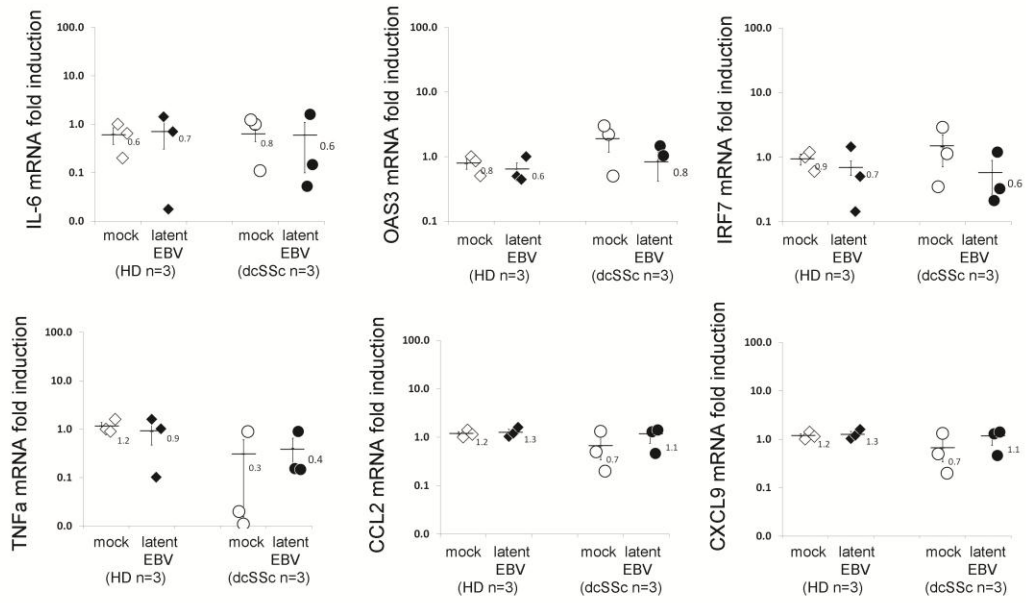

**Figure S4**

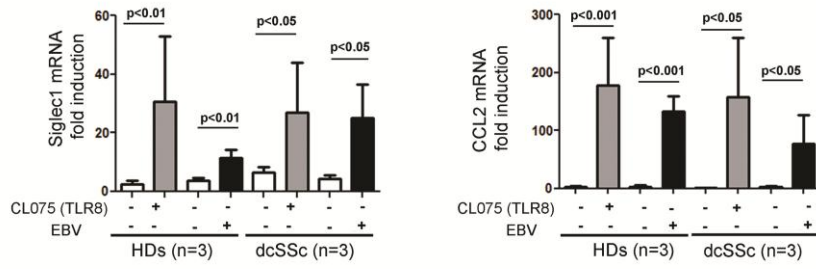

Figure S5

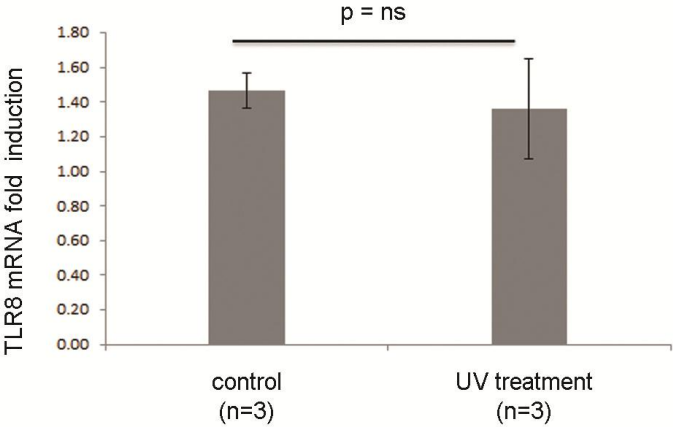

Figure S6

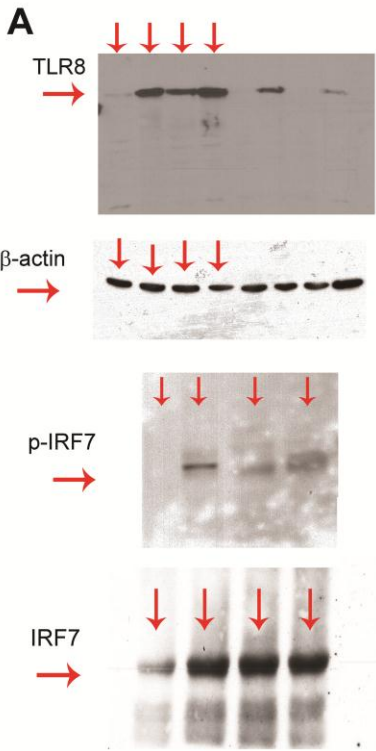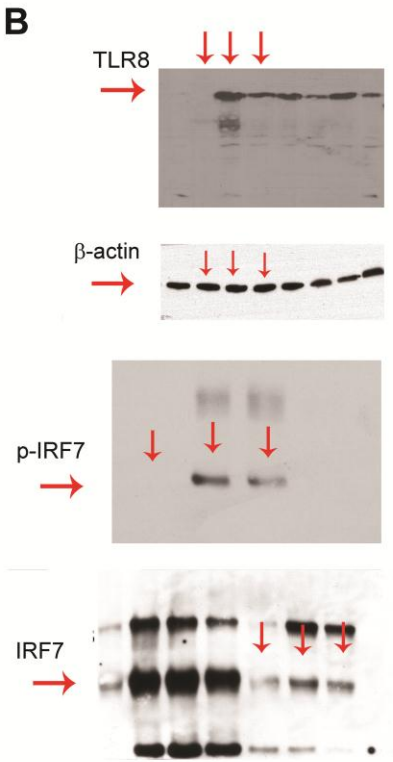

Figure S7

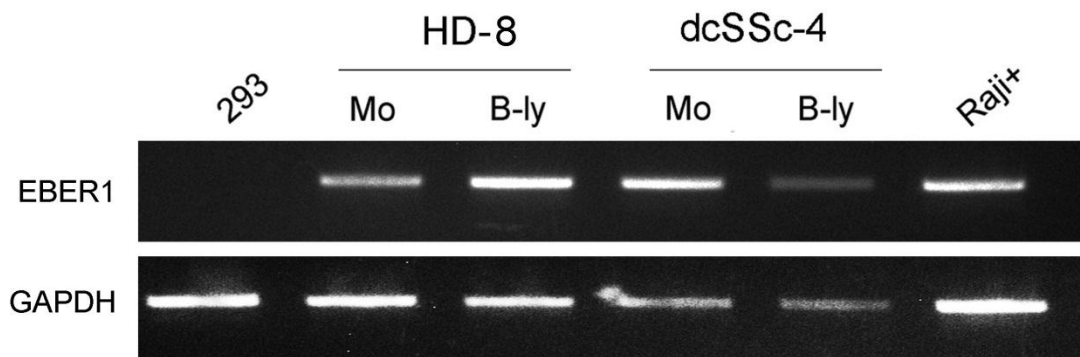

Figure S8

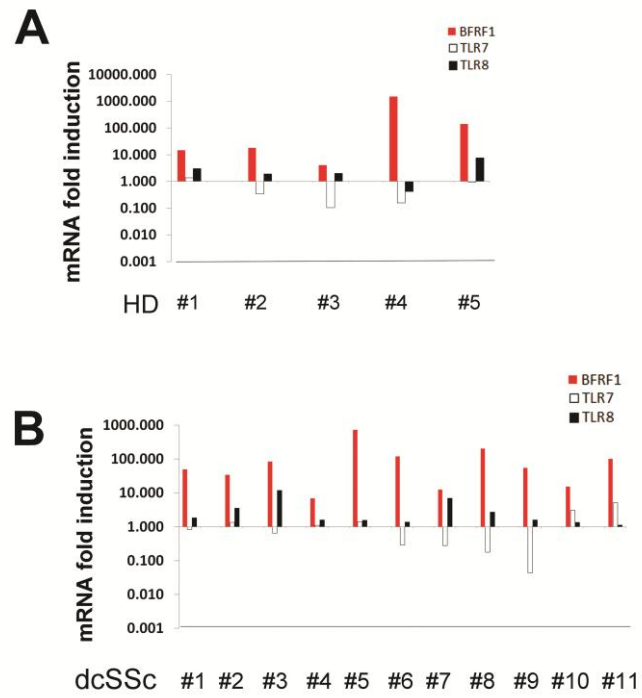

Supplement: 13075_2017_1237_MOESM1_ESM.pdf [file 13075_2017_1237_MOESM1_ESM.pdf]
